# Supplementary material
Source: PubMed Central journal article supplement (PMC10208202)

**Supplementary information**

---

**Addendum: Systems vaccinology of the  
BNT162b2 mRNA vaccine in humans**

---

In the format provided by the  
authors and unedited

Supplementary figure 1.

**4c**

Corrected

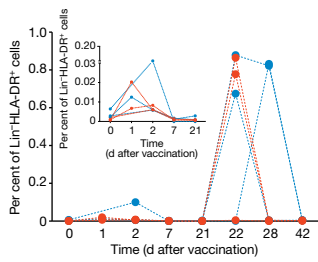

Previously published

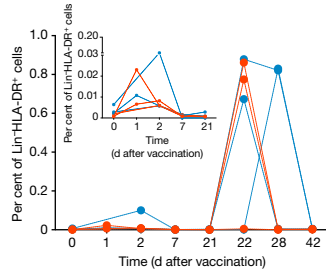

**4i**

Corrected

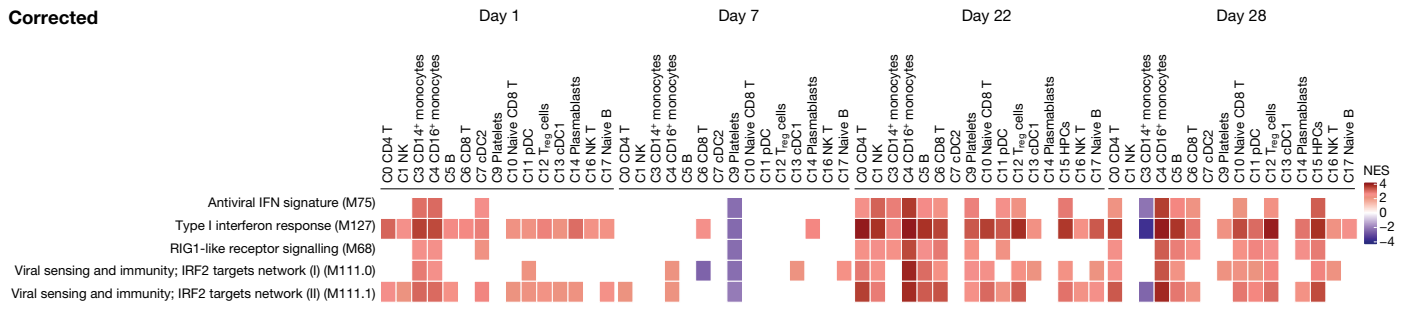

Previously published

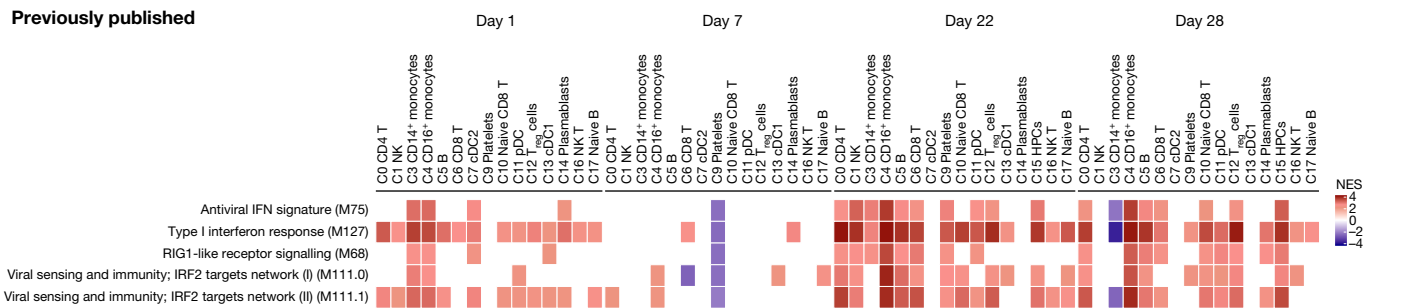

**Extended Data Fig. 10f**

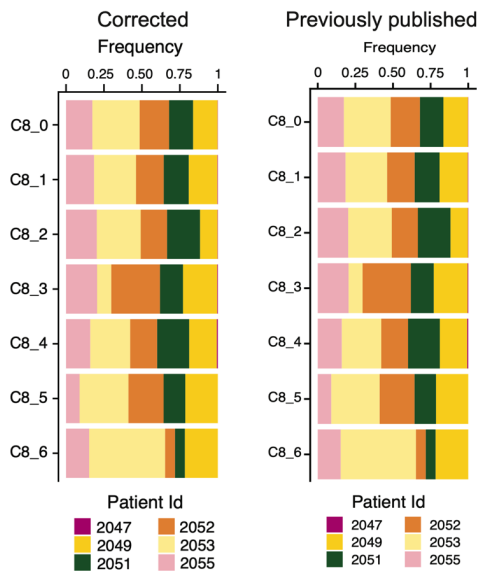

## Supplementary Figure 2.

Corrected (Extended Data Fig. 1a)

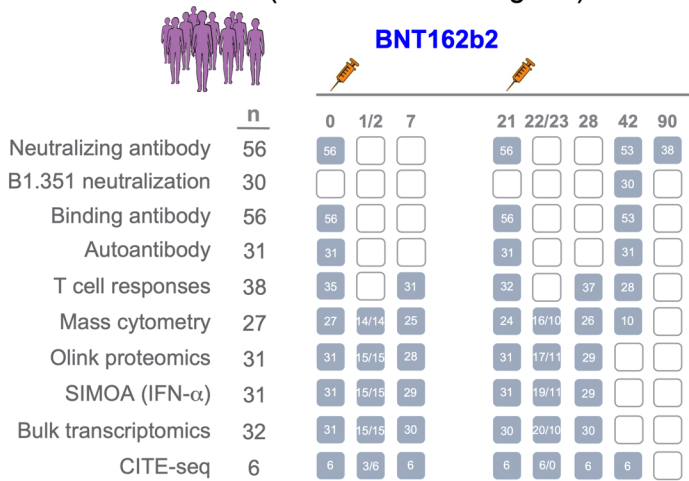

Previously published (Extended Data Fig. 1a)

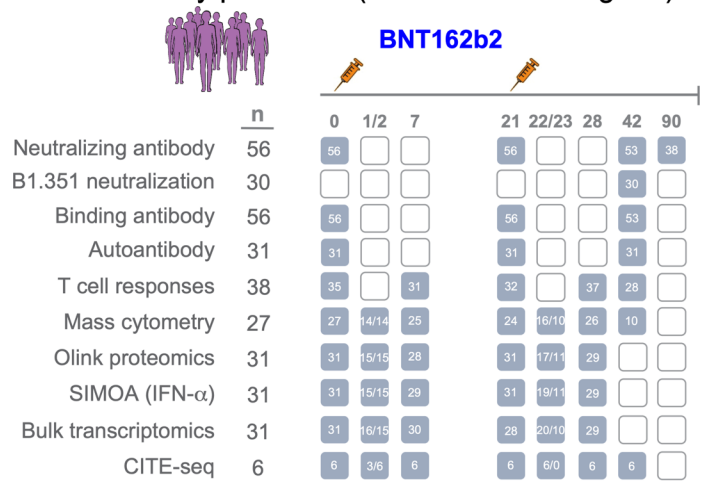

**Figure 3**

Corrected

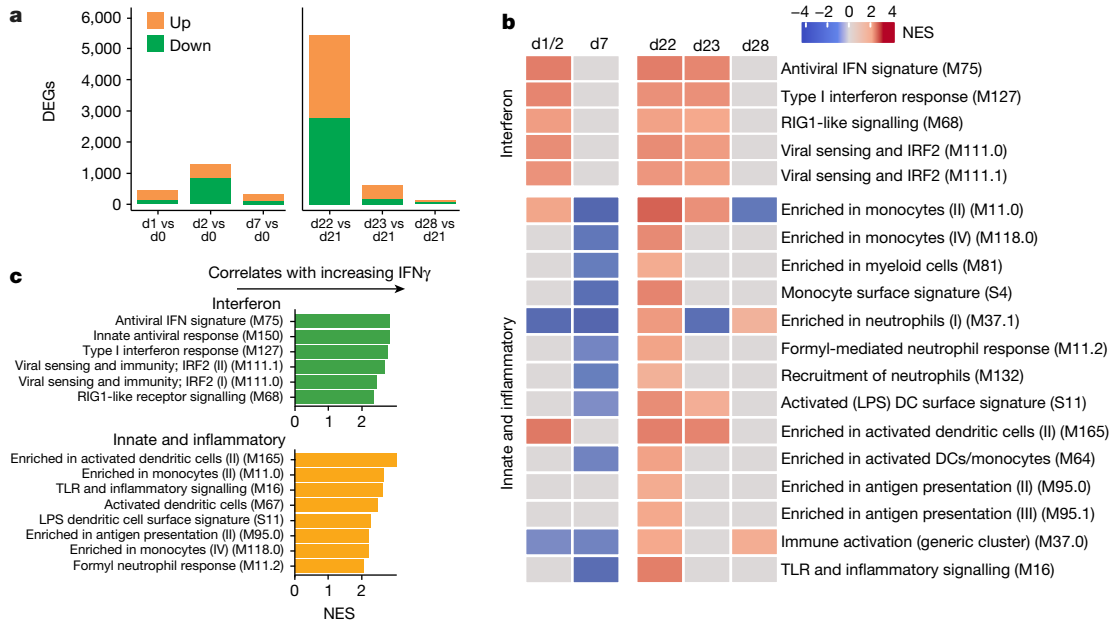

**Previously published**

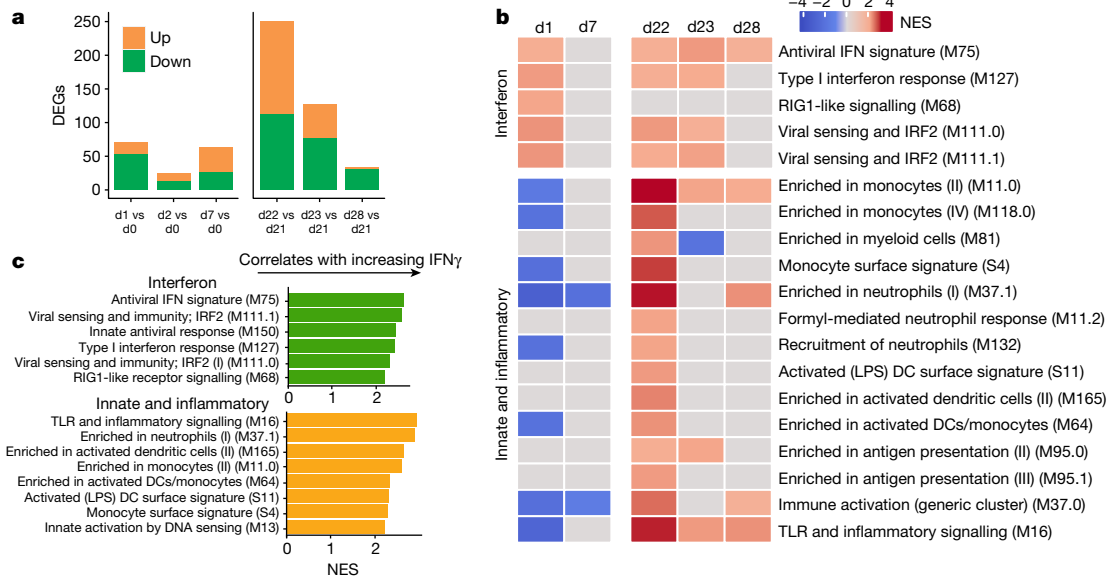



**Figure 5**

Corrected

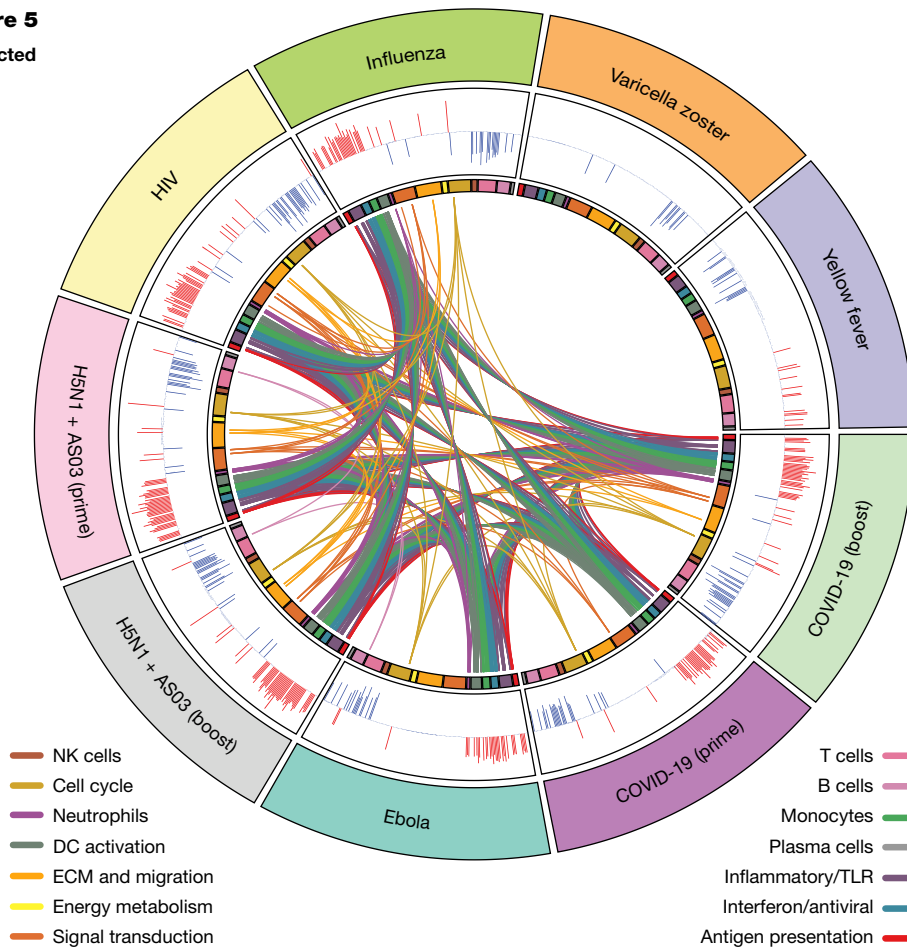

Previously published

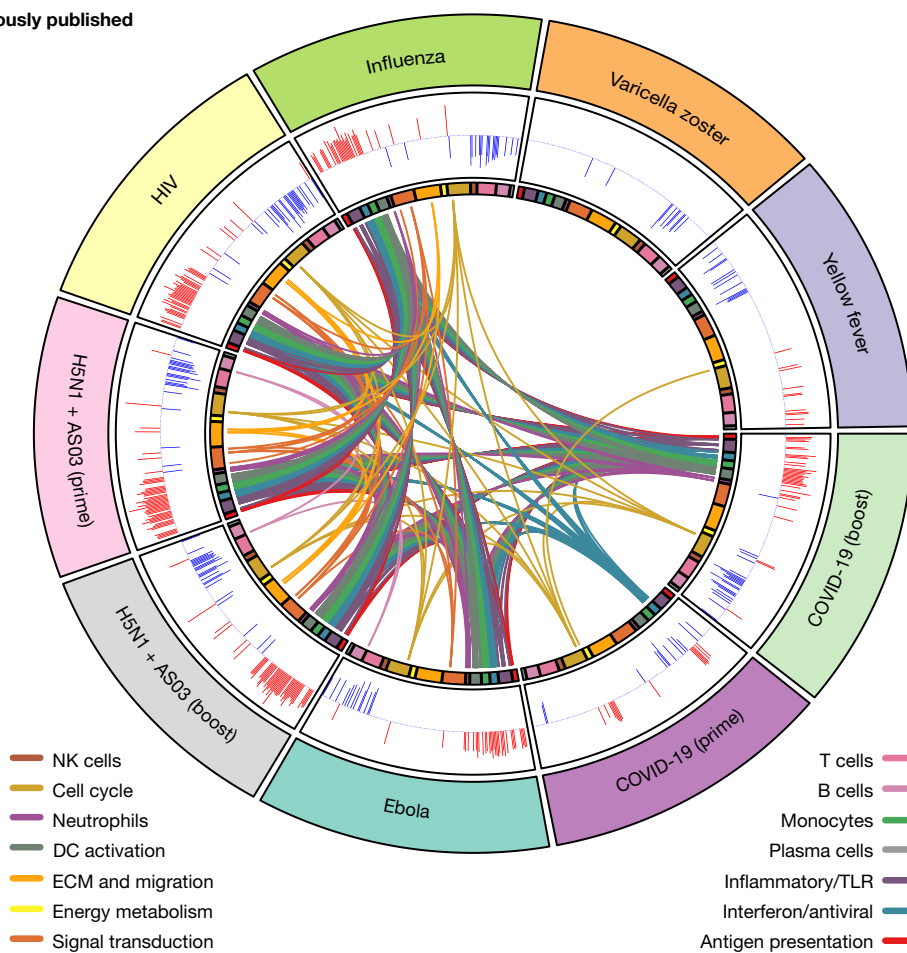

# Supplementary Figure 5.

## Corrected (Extended Data Fig. 8)

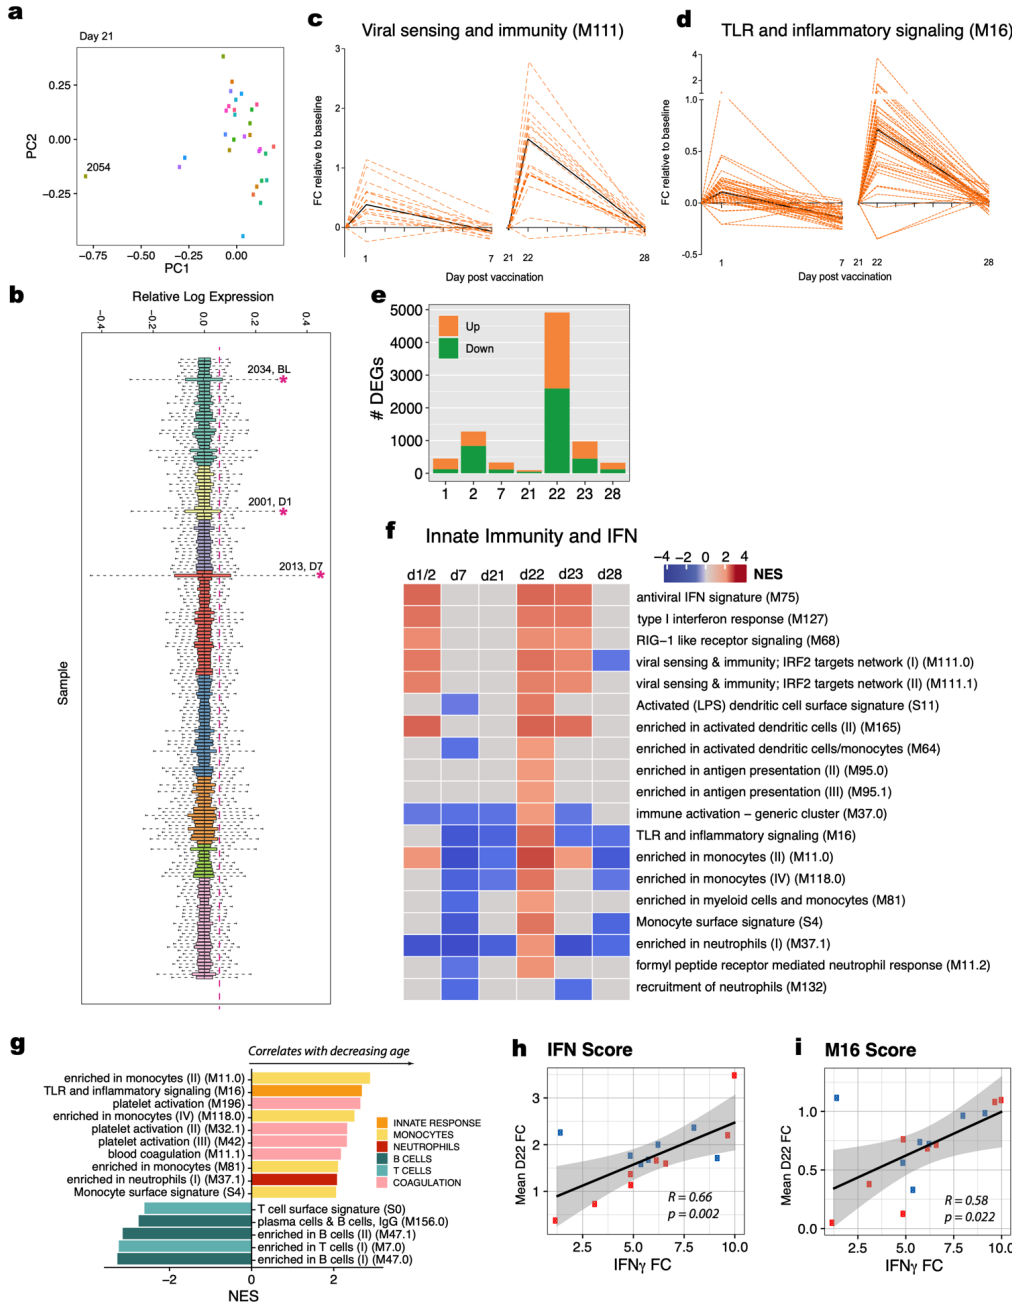

## Previously published (Extended Data Fig. 8)

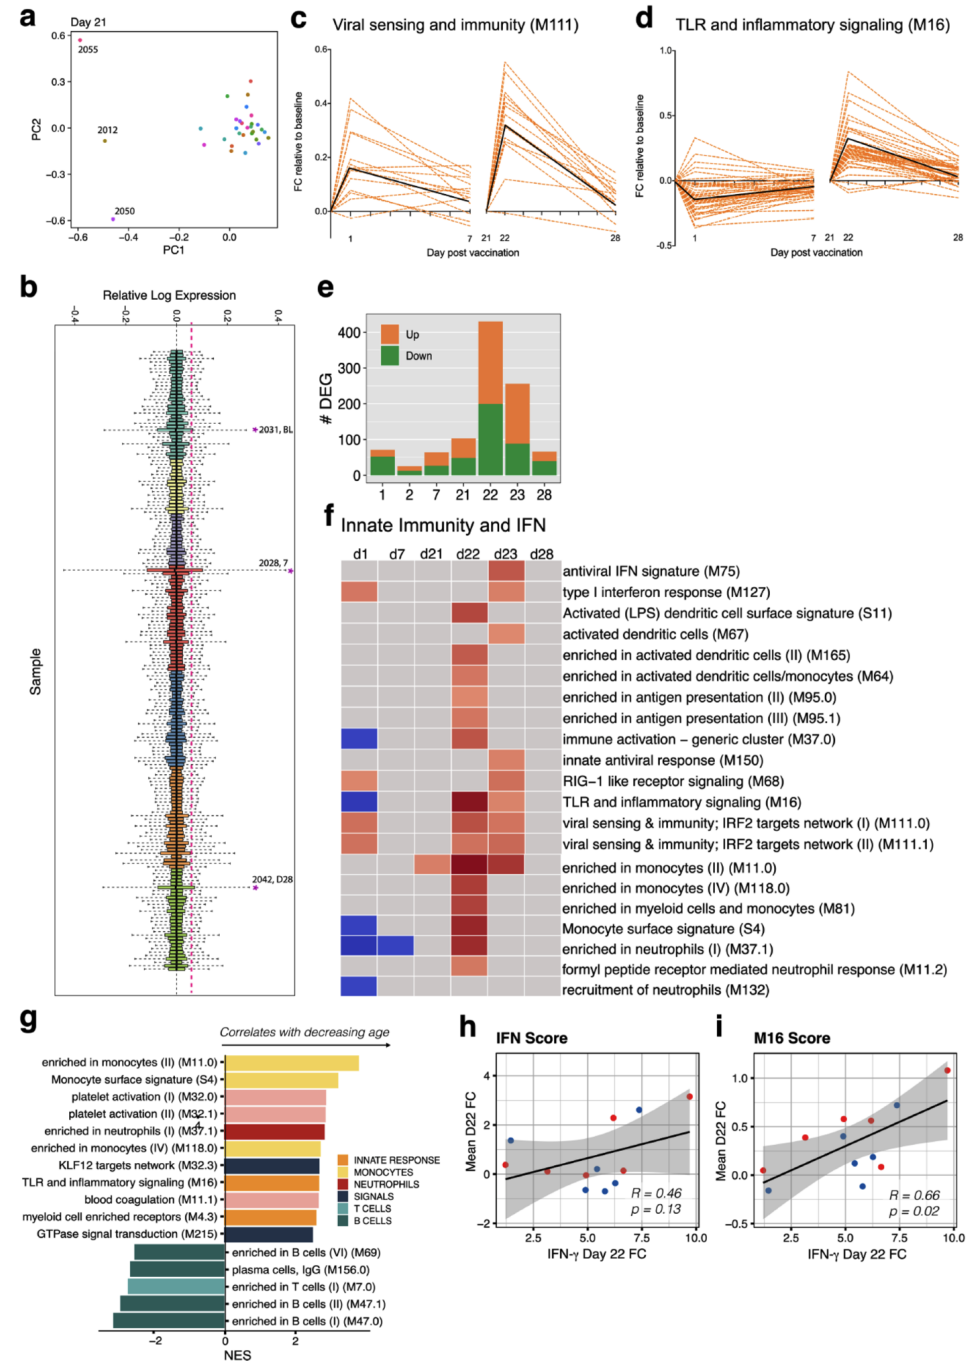

# Supplementary Figure 6.

Corrected (Extended Data Fig. 11)

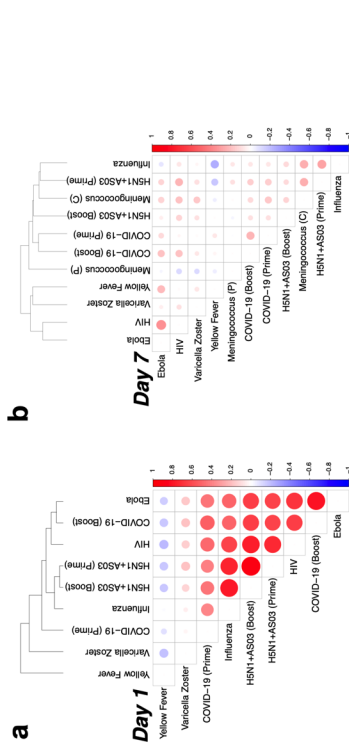

Previously published (Extended Data Fig. 11)

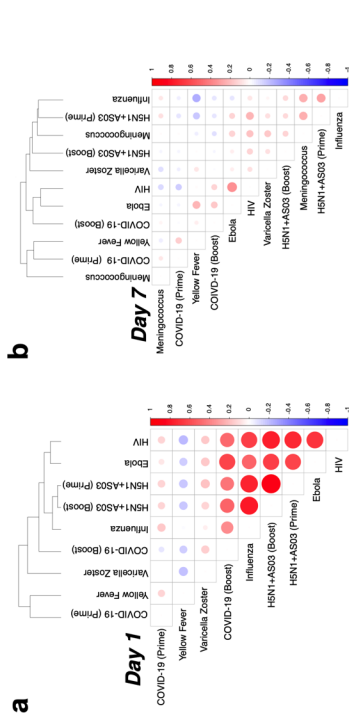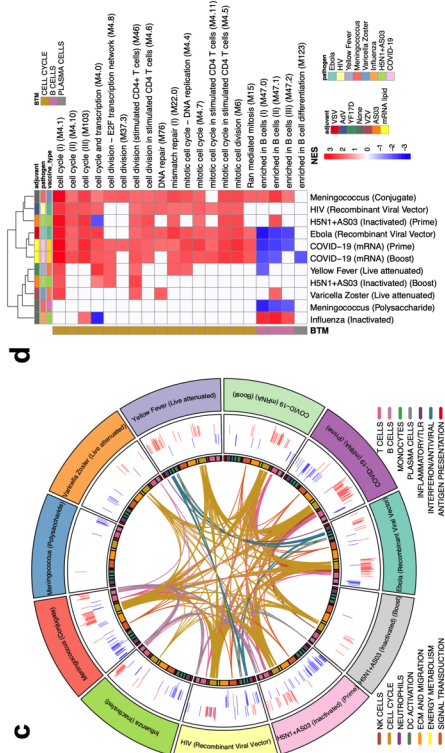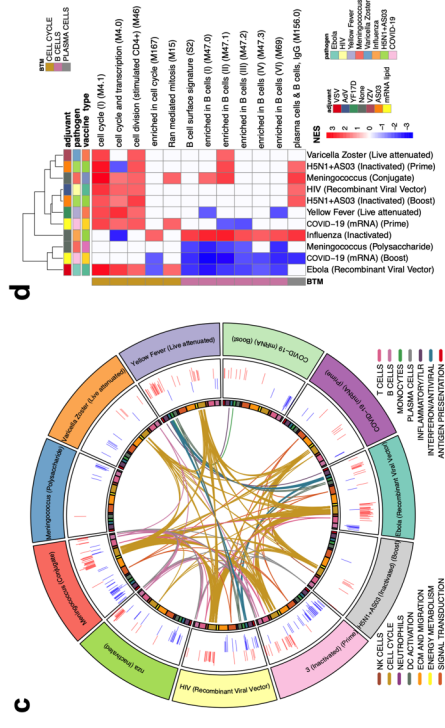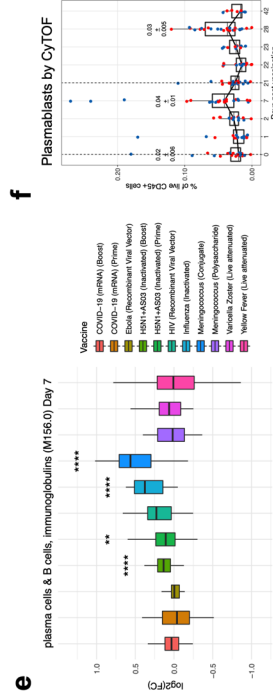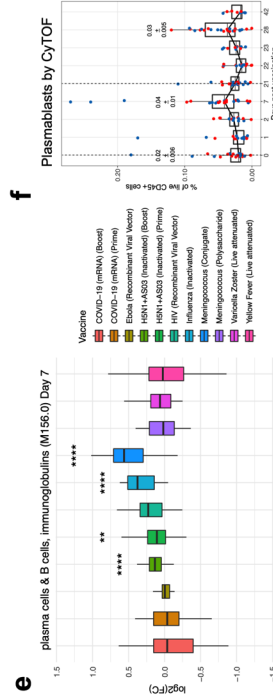



# Supplementary Figure 7.

## Corrected (Extended Data Fig. 12)

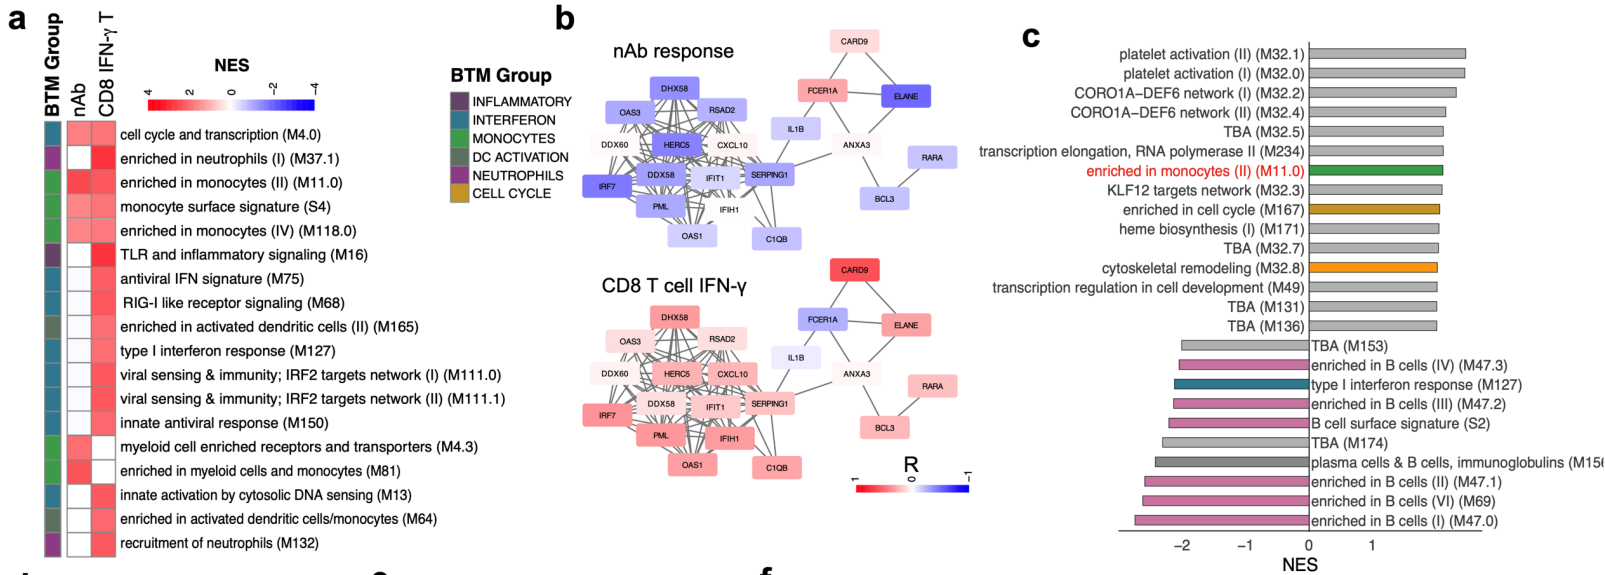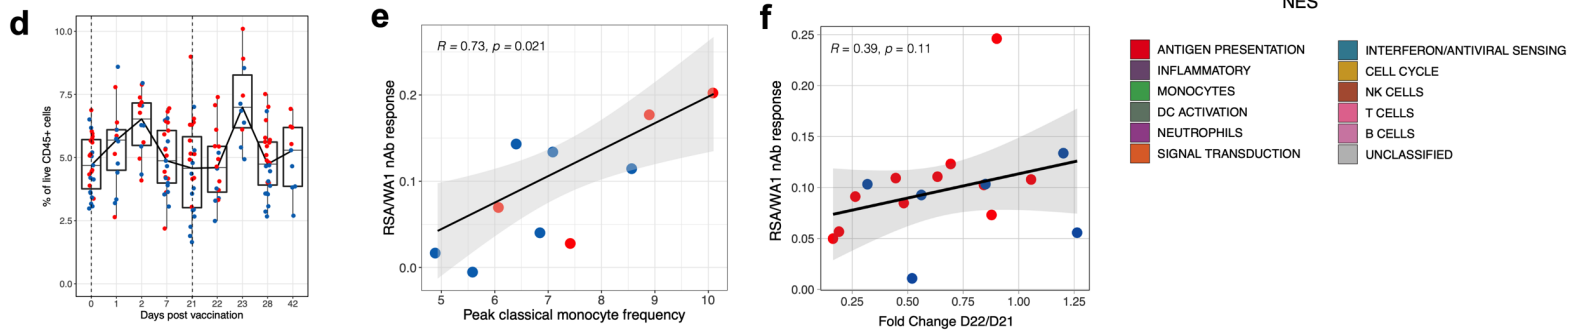

## Previously published (Extended Data Fig. 12)

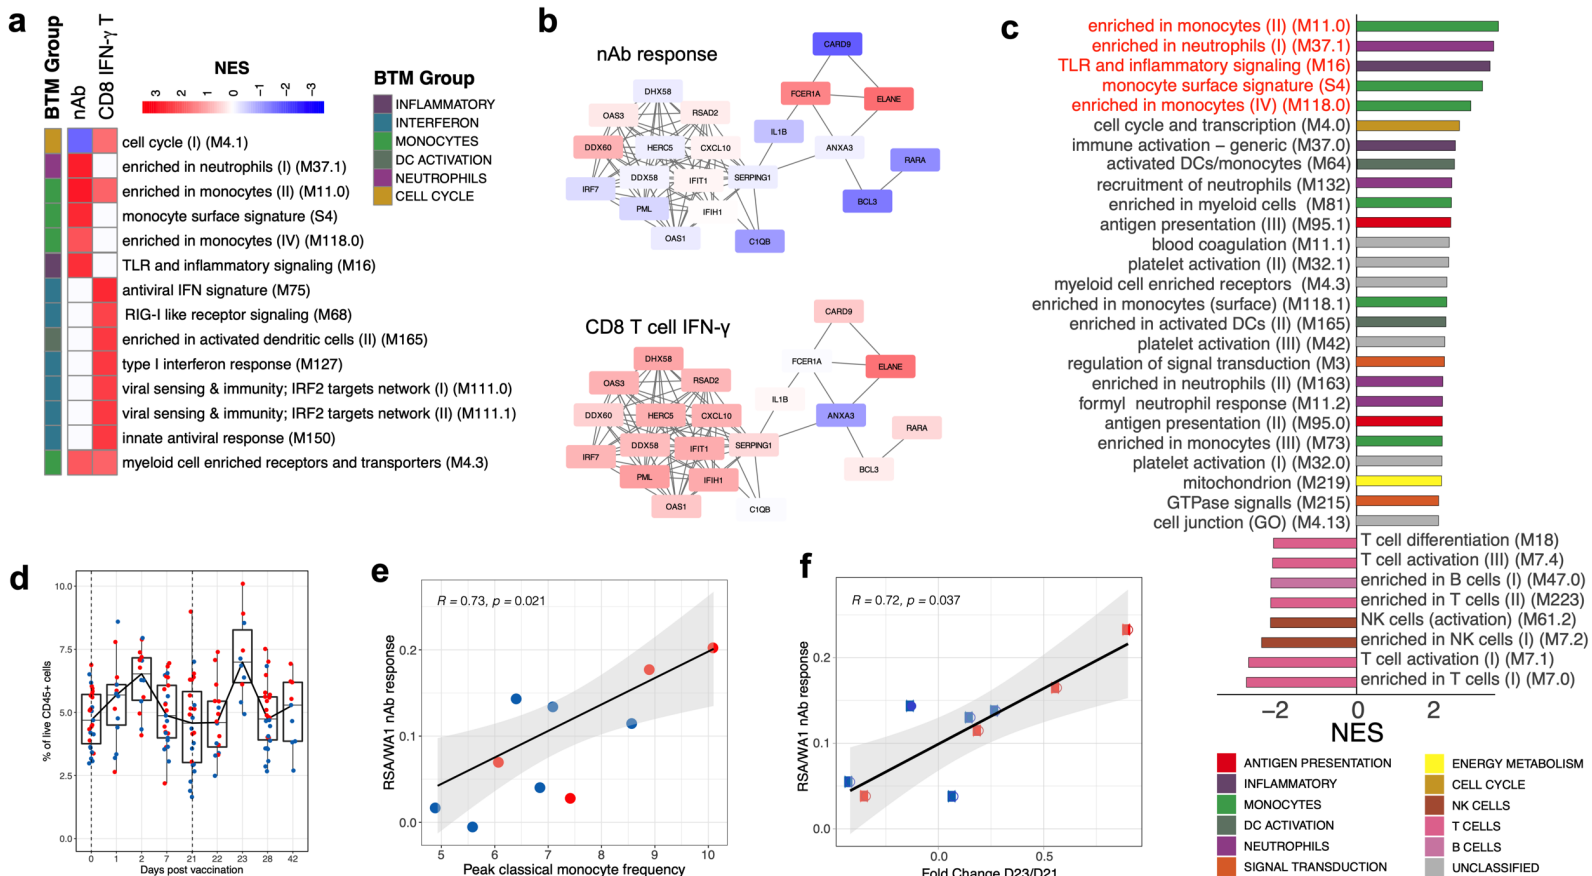

Supplement: 41586_2023_5977_MOESM1_ESM.pdf [file 41586_2023_5977_MOESM1_ESM.pdf]
